# Supplementary material
Source: bioRxiv or medRxiv preprint supplement (https://medrxiv.org/highwire/filestream/72575/field_highwire_adjunct_files/0/2020.02.21.20026468-1.pdf)
Supplement: Supplementary file [file 2020.02.21.20026468-1.pdf]

# Supplementary Material for “Trends in Transmissibility of 2019 Novel Coronavirus-infected Pneumonia in Wuhan and 29 Provinces in China”

Huazhen Lin<sup>a</sup>, Wei Liu<sup>a</sup>, Hong Gao<sup>a</sup>, Jinyu Nie<sup>a</sup>, Qiao Fan<sup>b</sup>

<sup>a</sup>*Center of Statistical Research and School of Statistics, Southwestern University of Finance and Economics, Chengdu, China*

<sup>b</sup>*Centre for Quantitative Medicine, Program in Health Services & Systems Research, Duke-NUS Medical School, Singapore*

## 1. Figures for 28 provinces

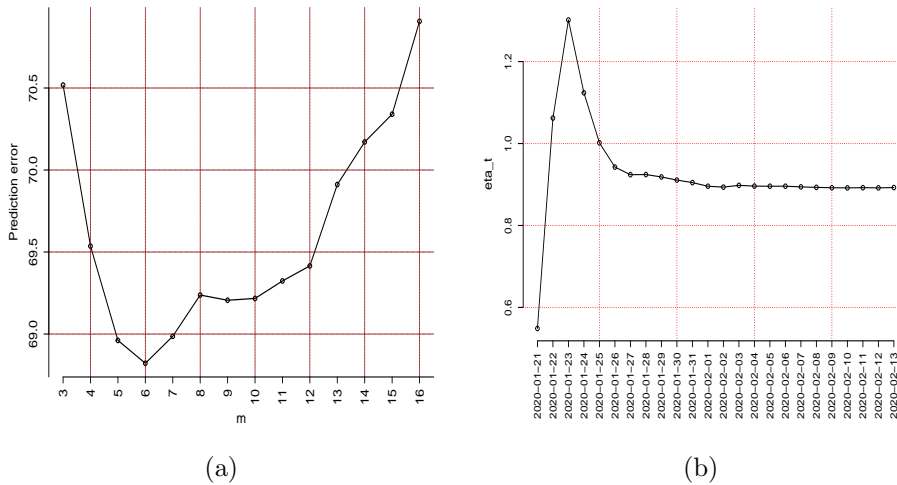

Figure 1: (a) Prediction error vs  $m$ ; (b) The pointwise estimates for  $\eta(t)$  when  $m = 6$ .

*Email address: linhz@swufe.edu.cn (Huazhen Lin)*

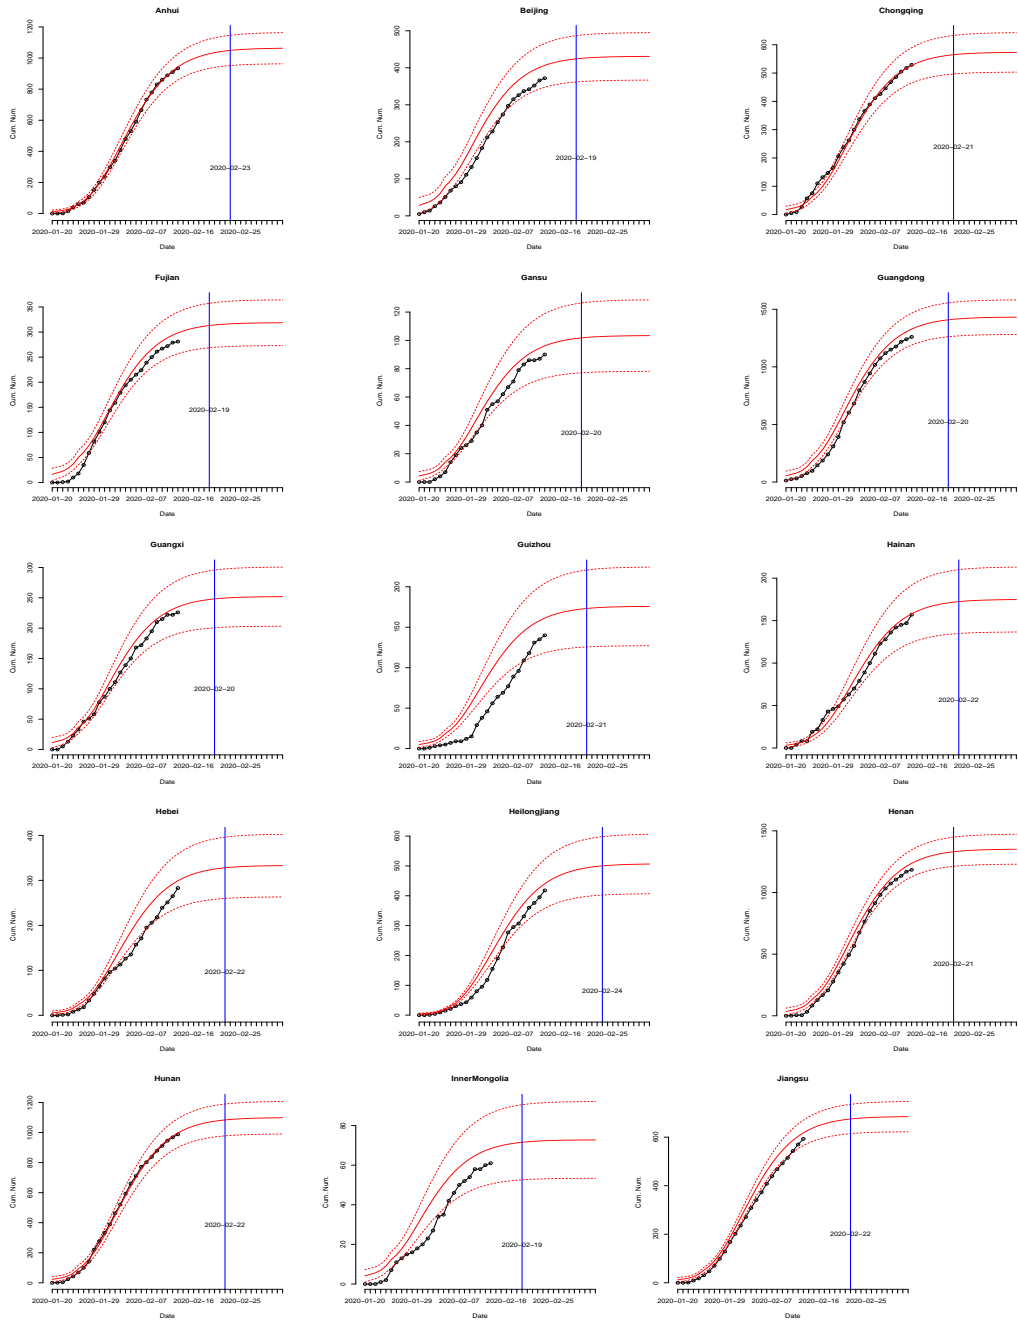

Figure 2: The estimated (red-solid) and observed (black-dotted) number of infectious over time  $t$ , as well as 95% CI (red-dashed) of the estimators.

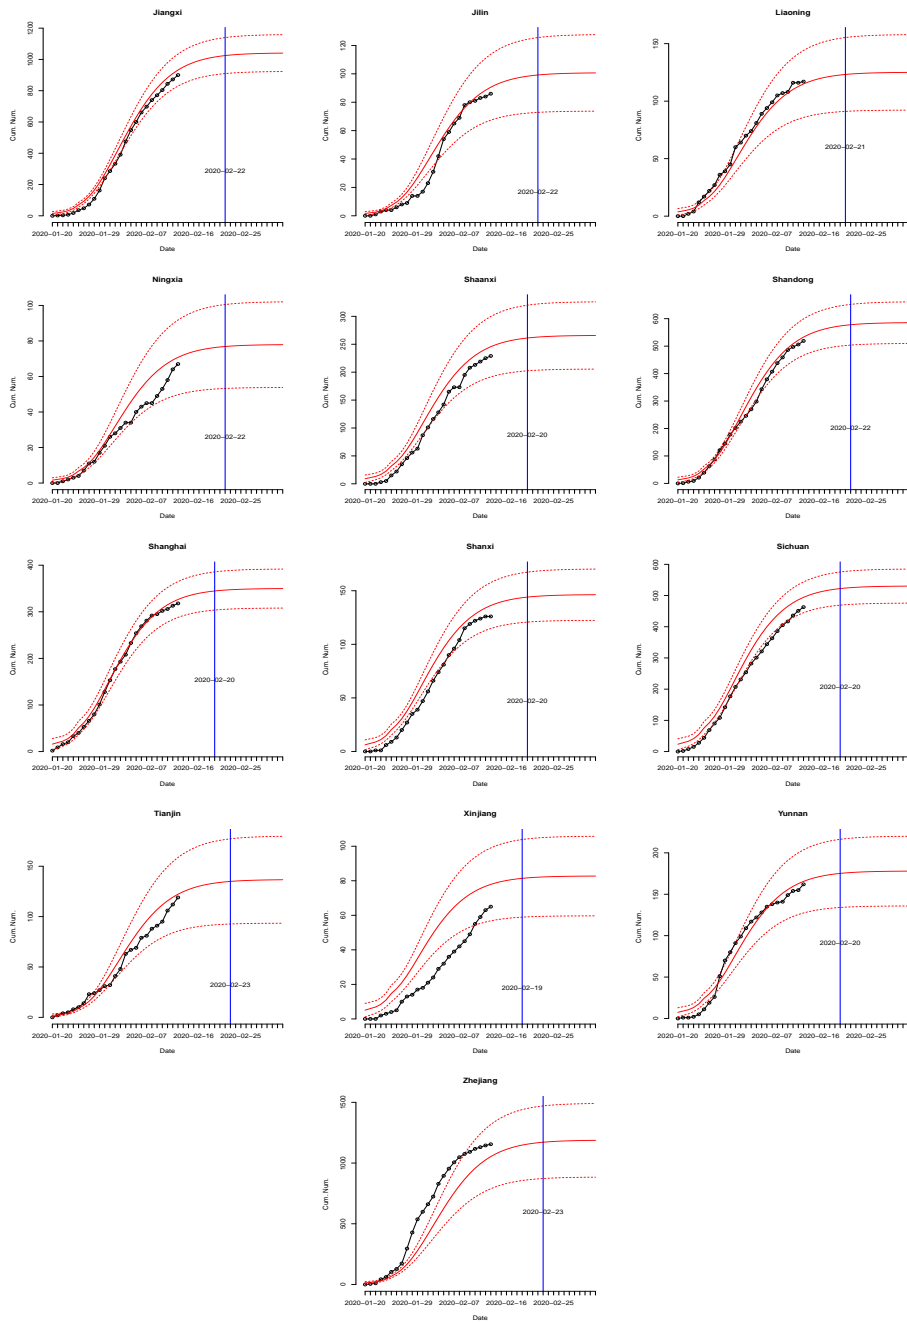

Figure 3: (a)-(j): The estimated (red-solid) and observed (black-dotted) number of infectious over time  $t$ , as well as 95% CI (red-dashed) of the estimators.

## 2. Figures for Hubei province

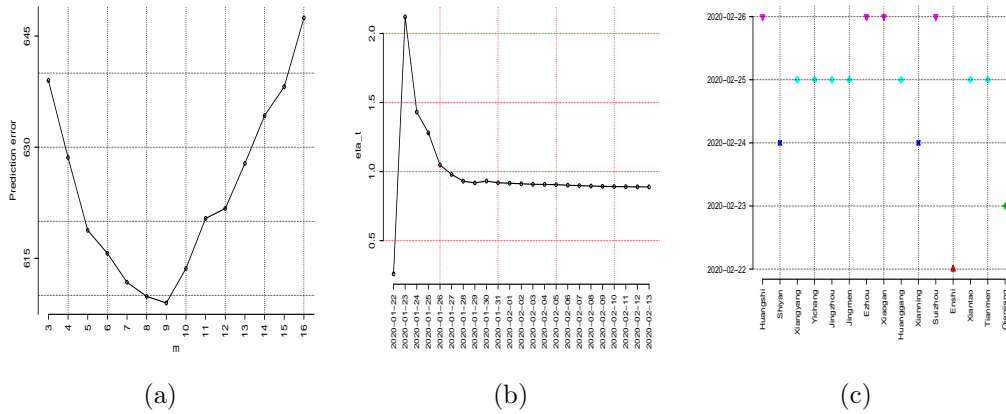

Figure 4: (a) Prediction error vs  $m$  for Hubei; (b) The pointwise estimates for  $\eta(t)$  when  $m = 9$  in Hubei; (c) The day reaching plateau by cities in Hubei.

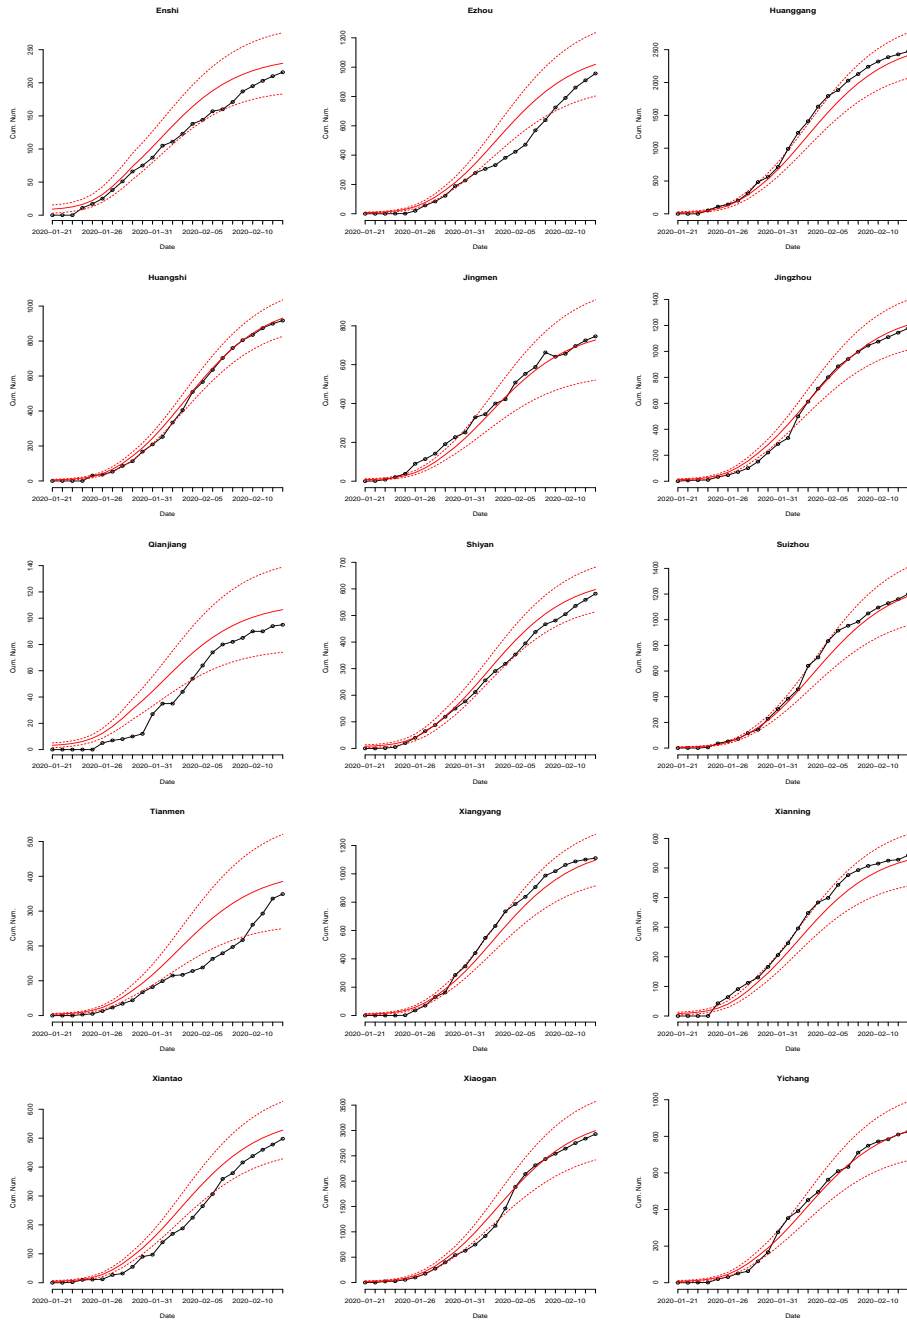

Figure 5: The estimated (red-solid) and observed (black-dotted) cumulative number of infectious over time  $t$ , as well as 95% CI (red-dashed) of the estimators for the cities in Hubei.

### 3. Figures for WuHan city

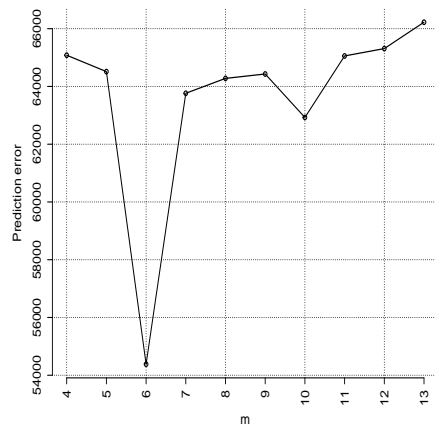

(a)

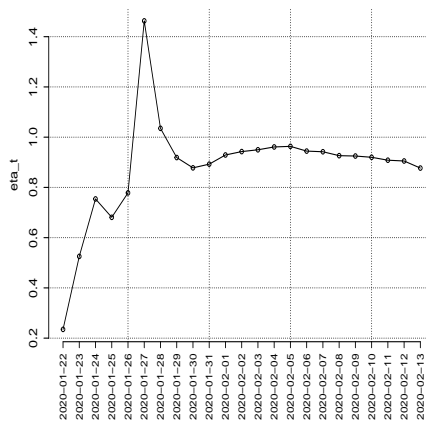

(b)

Figure 6: (a) Prediction error vs  $m$  for Wuhan; (b) The pointwise estimates for  $\eta(t)$  when  $m = 6$  in Wuhan.
